# Supplementary material
Source: HighWire-hosted journal article supplement (http://www.jrheum.org/highwire/filestream/29827/field_highwire_adjunct_files/0/160313_Data_Suppl.pdf)
Supplement: 160313_Data_Suppl.pdf [file 160313_Data_Suppl.pdf]

**Supplementary Table 1:** Antibodies used for flow cytometry.

| Antibody                                     | Fluorochrome | Clone       | Company        |
|----------------------------------------------|--------------|-------------|----------------|
| <i>Surface marker expression analysis</i>    |              |             |                |
| CD3                                          | APC-eF780    | UCHT1       | eBioscience    |
| CD4                                          | AF700        | OKT4        | eBioscience    |
| CD45RA                                       | BV650        | HI100       | BD Biosciences |
| FoxP3                                        | PE           | 236A/E7     | eBioscience    |
| CXCR3                                        | BV711        | 1C6/CXCR3   | BD Biosciences |
| CCR6                                         | APC          | 11A9        | BD Biosciences |
| CXCR5                                        | PerCP-Cy5.5  | RF8B2       | BD Biosciences |
| CCR4                                         | FITC         | 205410      | R&D Systems    |
| PD-1                                         | BV786        | EH12.1      | BD Biosciences |
| Fixable viability dye                        | eF506        | -           | eBioscience    |
| <i>In vitro cytokine production analysis</i> |              |             |                |
| CD3                                          | APC          | UCHT1       | BD Biosciences |
| CD8                                          | PerCP        | SK1         | BD Biosciences |
| IL-21                                        | PE           | eBio3A3-N2  | eBioscience    |
| IL-17                                        | AF488        | eBio64DEC17 | eBioscience    |
| IFN- $\gamma$                                | AF700        | B27         | BD Biosciences |
| IL-4                                         | PE-Cy7       | MP4-25D2    | Biolegend      |

**Supplementary Table 2:** Absolute numbers of different effector CD4<sup>+</sup> T-cell subsets at baseline, during B-cell depletion and after B-cell repopulation.

|                                    | Baseline | wk 16 | wk 24 | p-value*     | wk 48 | p-value**    |
|------------------------------------|----------|-------|-------|--------------|-------|--------------|
| Tfh-cells                          | 1.02     | 0.64  | 0.84  | <b>0.000</b> | 1.01  | 0.080        |
| Th17-cells                         | 1.16     | 1.38  | 1.36  | 0.167        | 1.24  | 0.920        |
| Th1-cells                          | 3.63     | 3.44  | 3.78  | 0.401        | 4.55  | 0.324        |
| Th2-cells                          | 4.44     | 4.49  | 5.94  | 0.253        | 4.83  | 0.825        |
| IL-21 <sup>+</sup> T-cells         | 1.95     | 1.80  | 1.60  | 0.292        | 2.30  | 0.095        |
| IL-17 <sup>+</sup> T-cells         | 0.42     | 0.28  | 0.21  | <b>0.000</b> | 0.52  | <b>0.000</b> |
| IFN- $\gamma$ <sup>+</sup> T-cells | 3.90     | 4.15  | 3.80  | 0.327        | 3.05  | 0.098        |
| IL-4 <sup>+</sup> T-cells          | 0.40     | 0.52  | 0.36  | 0.769        | 0.48  | 0.205        |

Values are presented as median absolute numbers (x10<sup>4</sup> cells/mL). \*p-value from Generalized Estimating Equation model, including values at baseline, week 16 and week 24. \*\*p-value from Wilcoxon matched pairs test, comparing week 24 with week 48.

**Supplementary Figure 1**

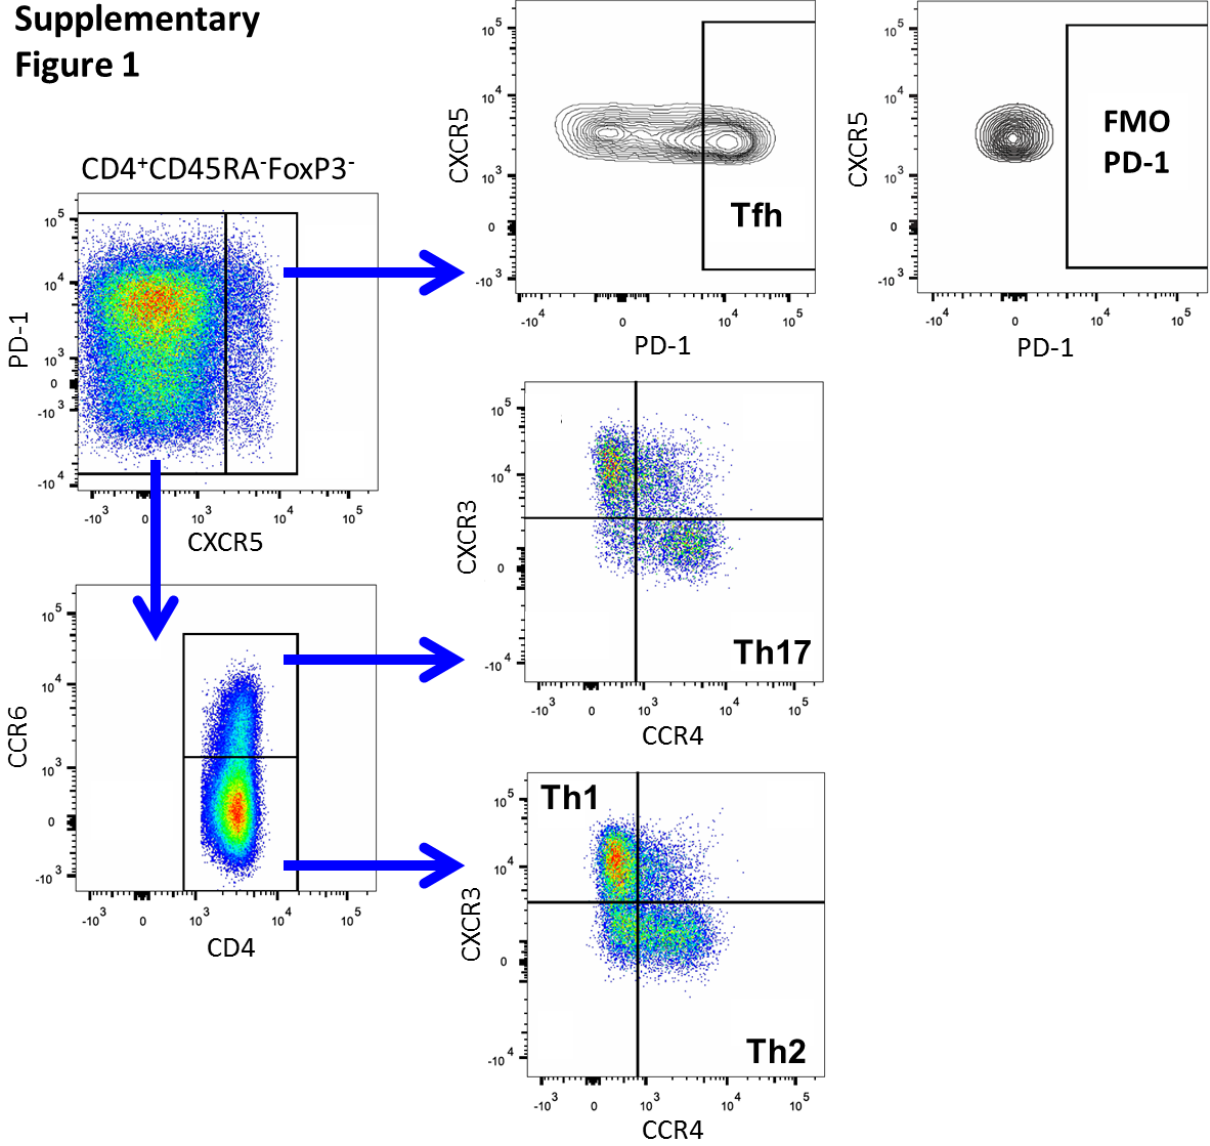

**Supplementary Figure 1: Gating strategy to distinguish CD4<sup>+</sup> T-cell subsets.** First, memory CD4<sup>+</sup> T-cells were gated (CD3<sup>+</sup>CD4<sup>+</sup>CD45RA<sup>-</sup>FoxP3<sup>-</sup>). Second, Th1<sup>-</sup>, Th2<sup>-</sup>, Tfh<sup>-</sup> and Th17<sup>-</sup> cells were gated based on the expression pattern of surface chemokine receptors. A gating plot for the PD-1 fluorescence minus one (FMO) control is also shown.

## Supplementary Figure 2

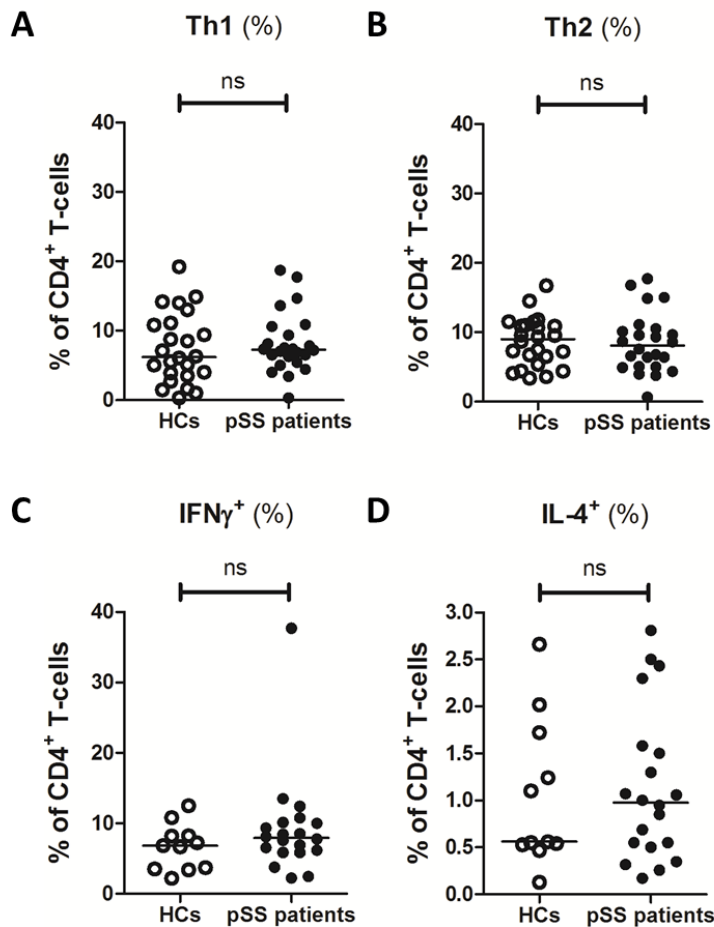

**Supplementary Figure 2: The proportion of Th1- and Th2-cells in pSS patients at baseline compared with HCs.** Frequencies of circulating (A) Th1- (CD45RA-CXCR5-CXCR3+CCR4-CCR6-) and (B) Th2-cells (CD45RA-CXCR5-CXCR3-CCR4+CCR6-) in pSS patients (n=24) and HCs (n=24) are displayed. Additionally, frequencies of (C) IFN $\gamma$ - and (D) IL-4-producing CD4<sup>+</sup> T-cells in pSS patients (n=20) and HCs (n=11) are displayed. Horizontal lines indicate the median. P-value < 0.05 was considered statistically significant. P-values were calculated using the nonparametric Mann-Whitney U-test.

### Supplementary Figure 3

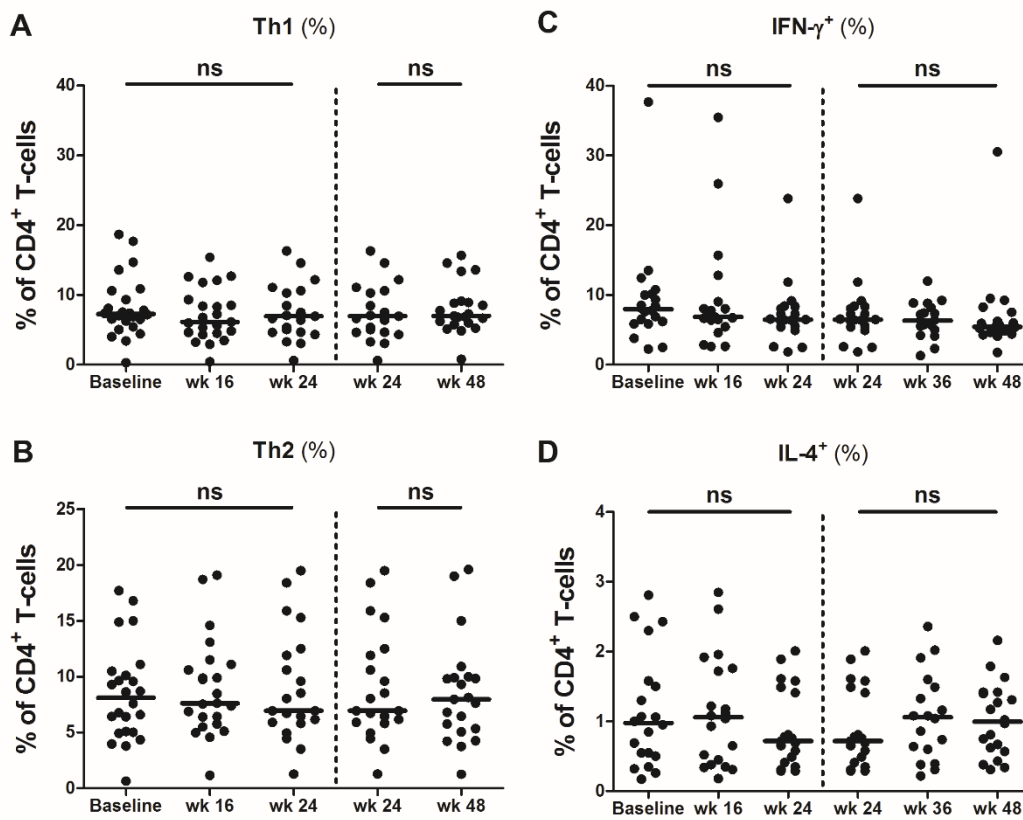

**Supplementary Figure 3: Frequencies of Th1-cells, Th2-cells, IFN- $\gamma$ - and IL-4-producing CD4<sup>+</sup> T-cells after rituximab.** (A) Frequencies of Th1-cells (CD45RA<sup>-</sup>CXCR5<sup>-</sup>CXCR3<sup>+</sup>CCR4<sup>-</sup>CCR6<sup>-</sup>) and (B) Th2-cells (CD45RA<sup>-</sup>CXCR5<sup>-</sup>CXCR3<sup>-</sup>CCR4<sup>+</sup>CCR6<sup>-</sup>) are displayed (n=24). (C) Frequencies of IFN- $\gamma$ - and (D) IL-4-producing CD4<sup>+</sup> T cells are displayed (n=20). Values within subjects over time were analyzed with generalized estimating equations during B-cell depletion (week 0-24) and B-cell repopulation (week 24-48). Horizontal lines indicate the median. P-value <0.05 was considered statistically significant.

### Supplementary Figure 4

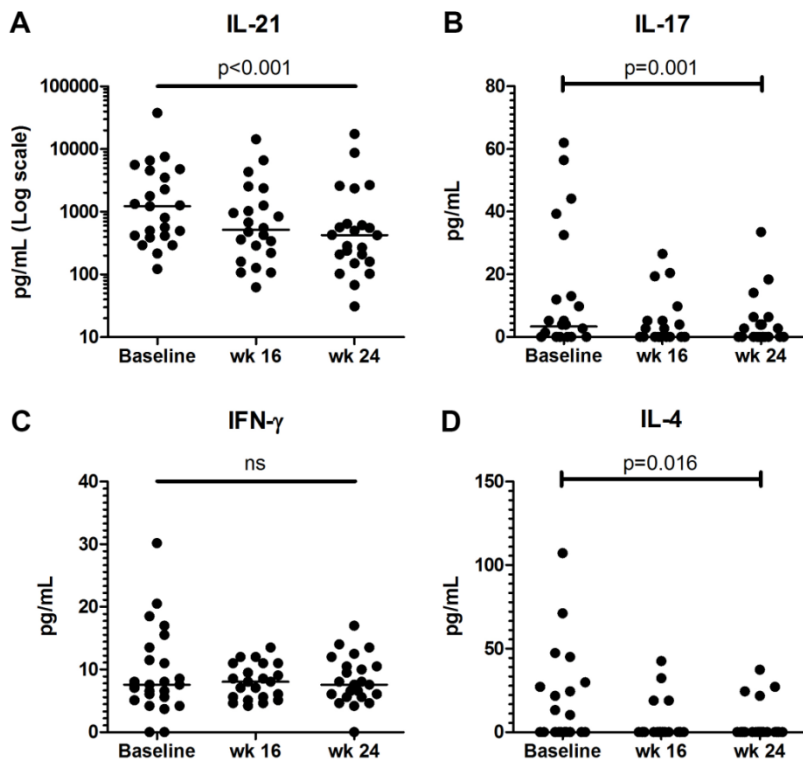

**Supplementary Figure 4: Serum cytokines levels change after rituximab.** Serum levels of IL-21, IL-17, IFN- $\gamma$  and IL-4 were measured by a multiplex bead immunoassay. Values from 24 pSS patients during B-cell depletion (week 0-24) are displayed. Changes in IL-21 and IFN- $\gamma$  within patients over time were analyzed with generalized estimating equations (GEE). IL-17 and IL-4 could not be modelled using GEE and therefore values at baseline and week 24 were compared using Wilcoxon matched pairs tests. Lines indicate the median. P-value < 0.05 was considered statistically significant.

### Supplementary Figure 5

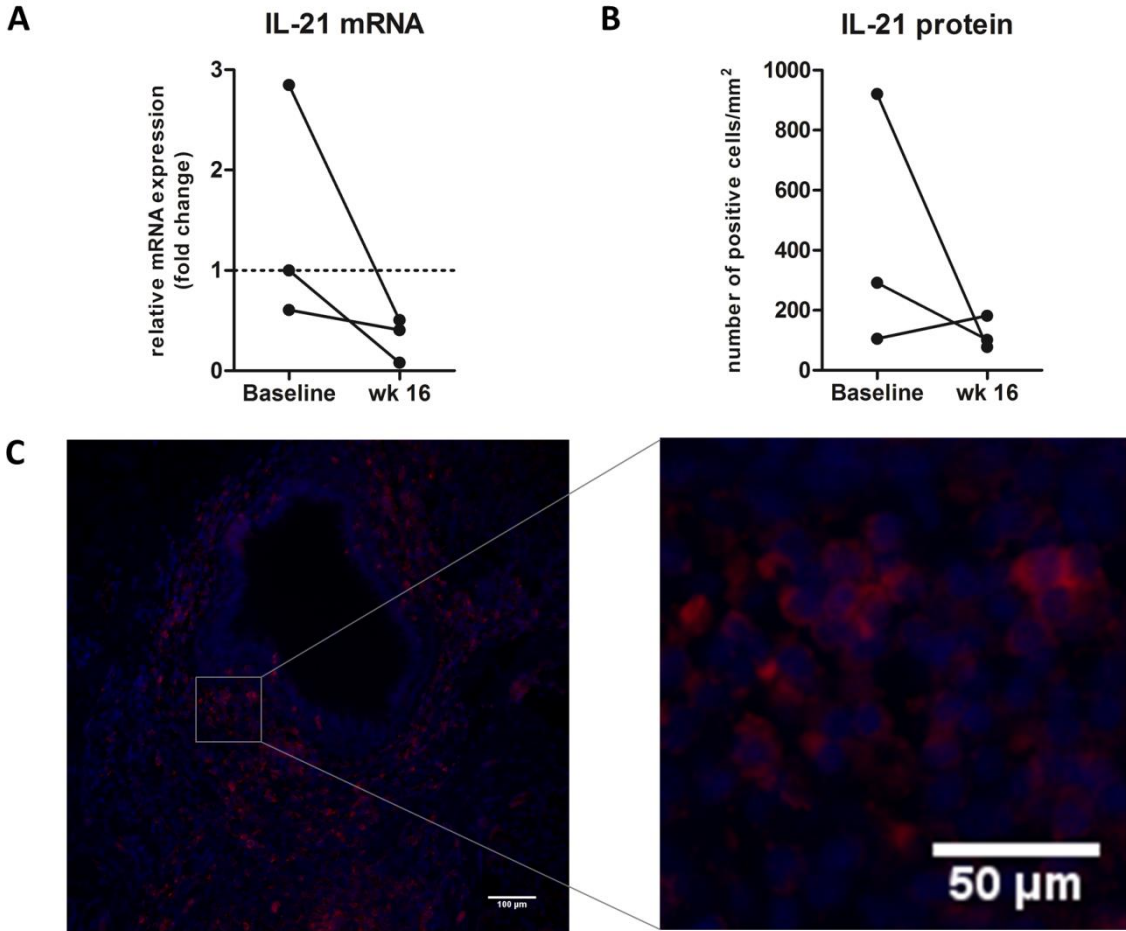

**Supplementary Figure 5: IL-21 expression in parotid gland tissue before and after rituximab.** (A) IL-21 mRNA expression levels plotted as the fold change relative to median baseline expression of IL-21 mRNA and (B) IL-21 protein expression quantified by the number of IL-21-positive cells per mm<sup>2</sup> of parotid gland tissue before and after B-cell depletion therapy. (C) Representative immunofluorescence image from a patient with high numbers of IL-21-positive cells in the parotid gland at baseline. Red staining represents IL-21. DAPI (blue) staining is used to label nuclei of cells.
